# Supplementary material for: Mortars from the Palace of Knossos in Crete, Greece: A Multi-Analytical Approach
Source: MDPI journal article supplement (doi:10.3390/min12010030), 2021-12-24
Supplement: s1 [file s1]

## Supplementary materials

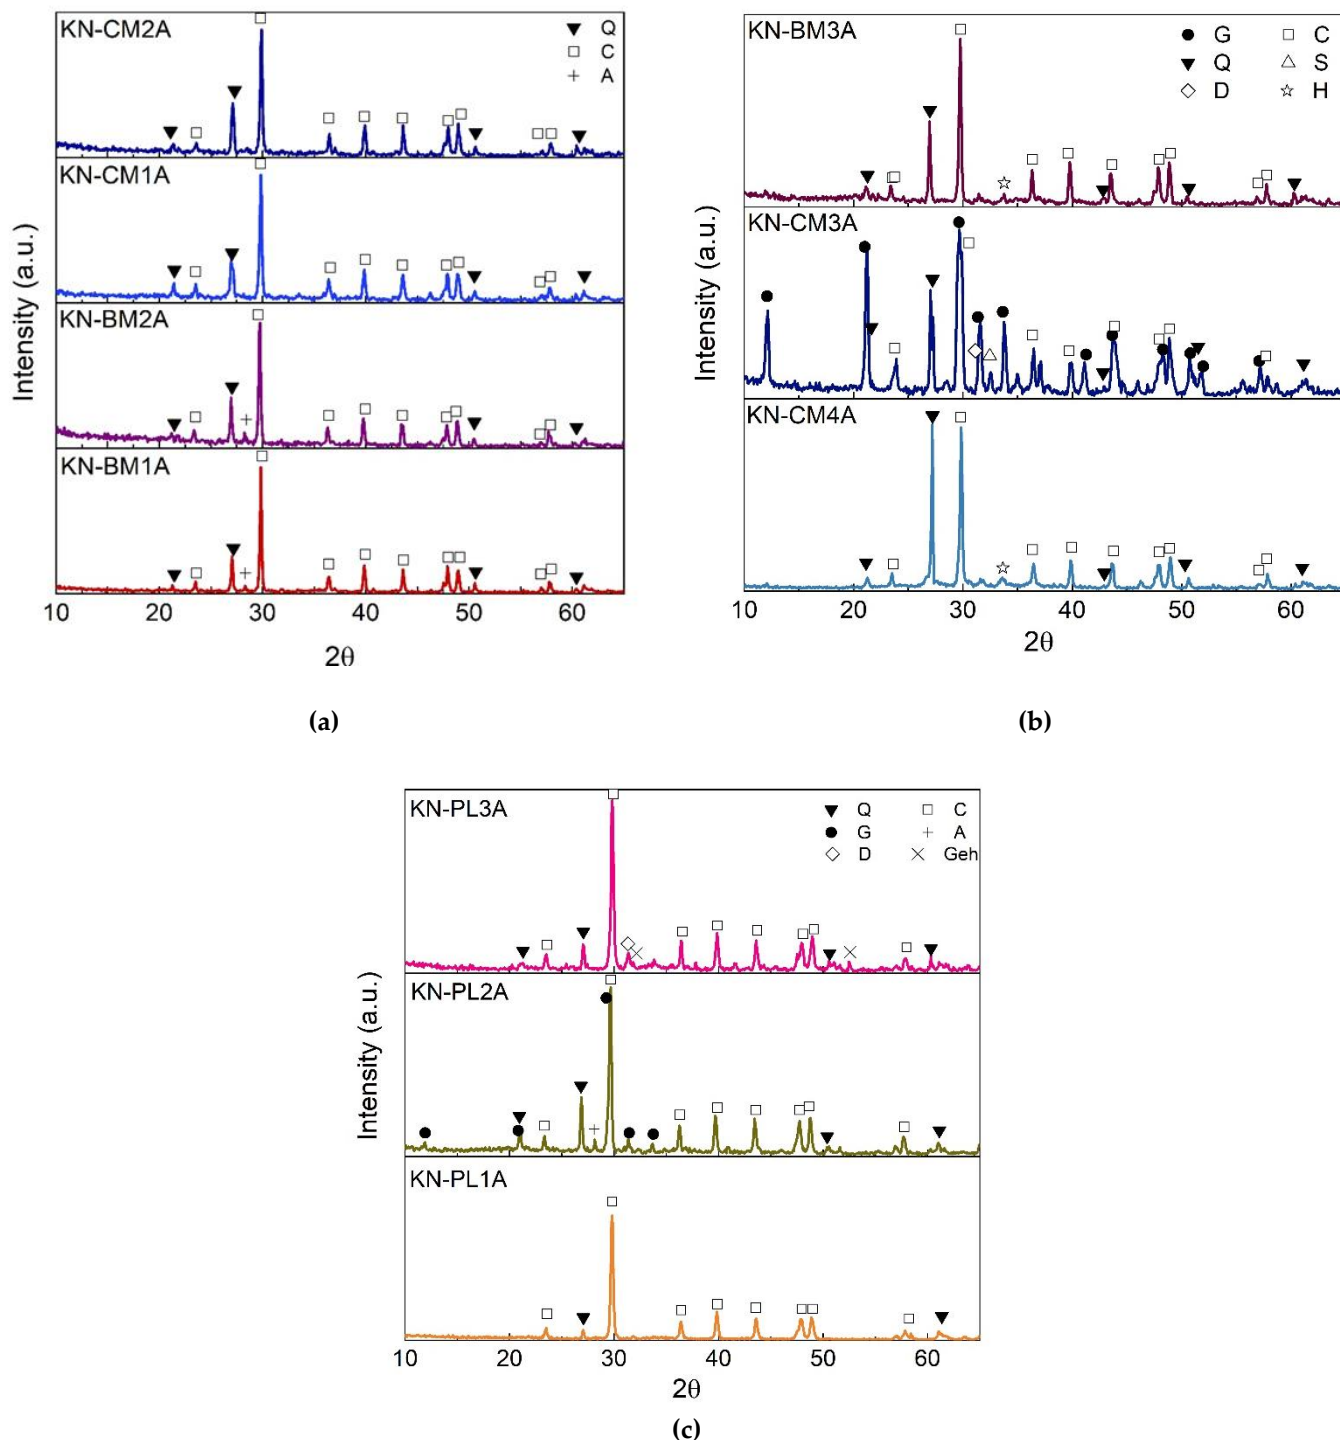

**Figure S1.** Crystalline phases identified by XRD, corresponding to the results presented in Table 4: **(a)** bedding mortar samples from West Magazines; **(b)** bedding mortar samples from East Wing; **(c)** render samples in both wings of the Palace of Knossos. (C – calcite, Q – quartz, A – albite, G – gypsum, D – dolomite, S – siderite, H – hematite, Geh – gehlenite).
